# Supplementary material for: Clay-Polymer Nanocomposites Prepared by Reactive Melt Extrusion for Sustained Drug Release
Source: PubMed Central journal article supplement (PMC7022276; doi:10.3390/pharmaceutics12010051), 2020-01-07
Supplement: pharmaceutics-12-00051-s001.pdf [file pharmaceutics-12-00051-s001.pdf]

# Supplementary Materials: Clay-Polymer Nanocomposites Prepared by Reactive Melt Extrusion for Sustained Drug Release

Xu Liu, Xingyu Lu, Yongchao Su, Eucharist Kun and Feng Zhang

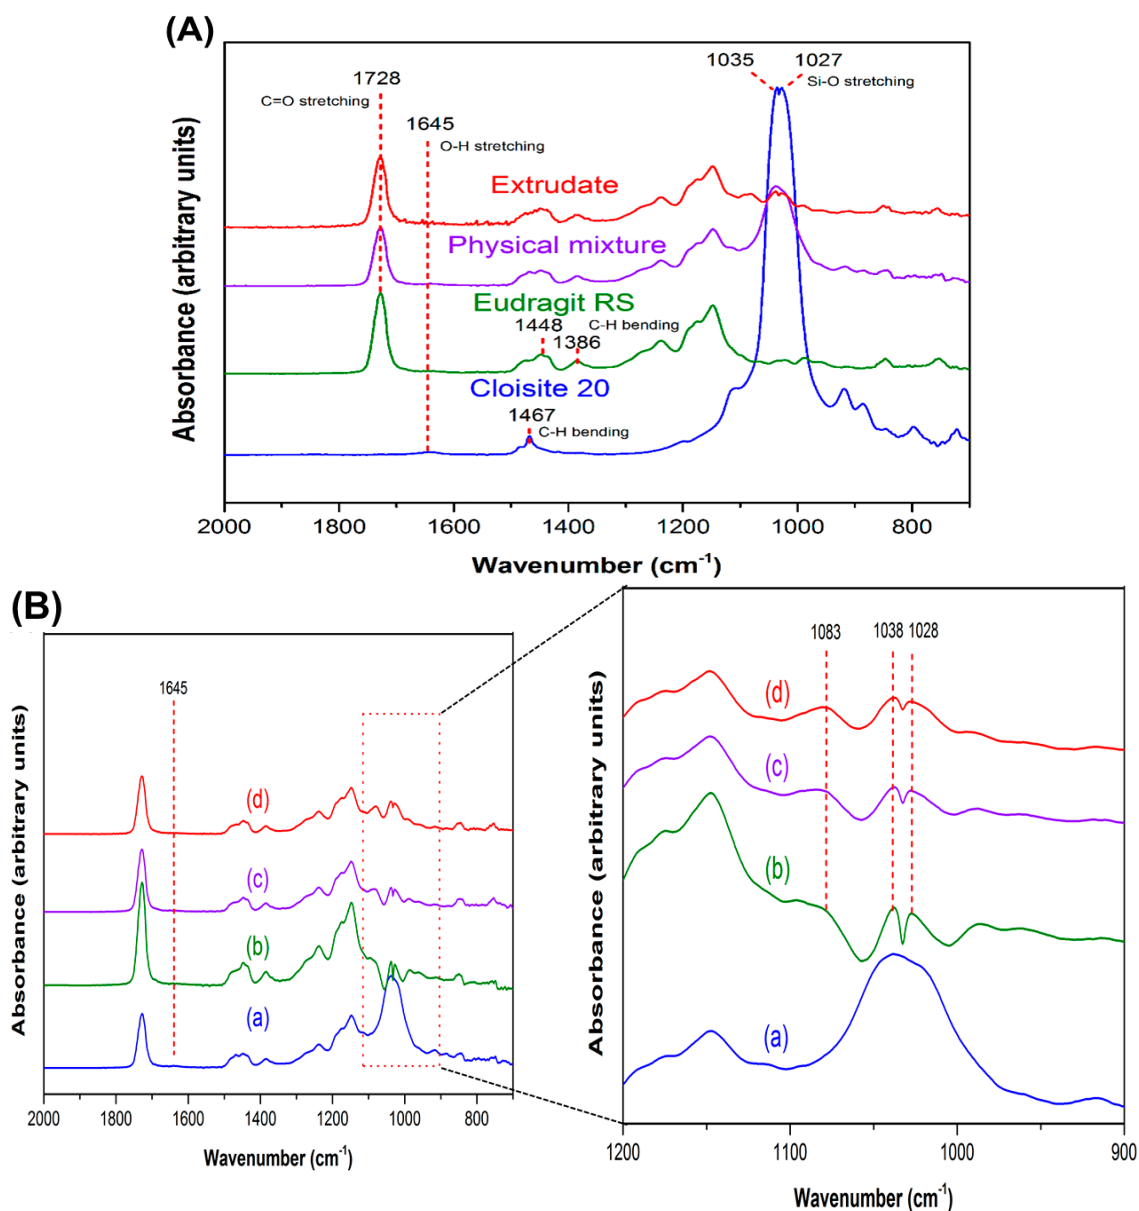

**Figure S1.** FTIR profiles of Cloisite 20 extrudates. **(A)** From bottom to top, (a) 5% Cloisite 20-95% Eudragit RS physical mixture; (b) Cloisite 20 extrudates at 5% clay loading; (c) Cloisite 20 extrudates at 10% clay loading; (d) Cloisite 20 extrudates at 15% clay loading. **(B)** From bottom to top, (a) 5% Cloisite 20-95% Eudragit RS physical mixture; (b) Cloisite 20 nanocomposite at 5% clay loading; (c) Cloisite 20 nanocomposite at 10% clay loading; (d) Cloisite 20 nanocomposite at 15% clay loading.

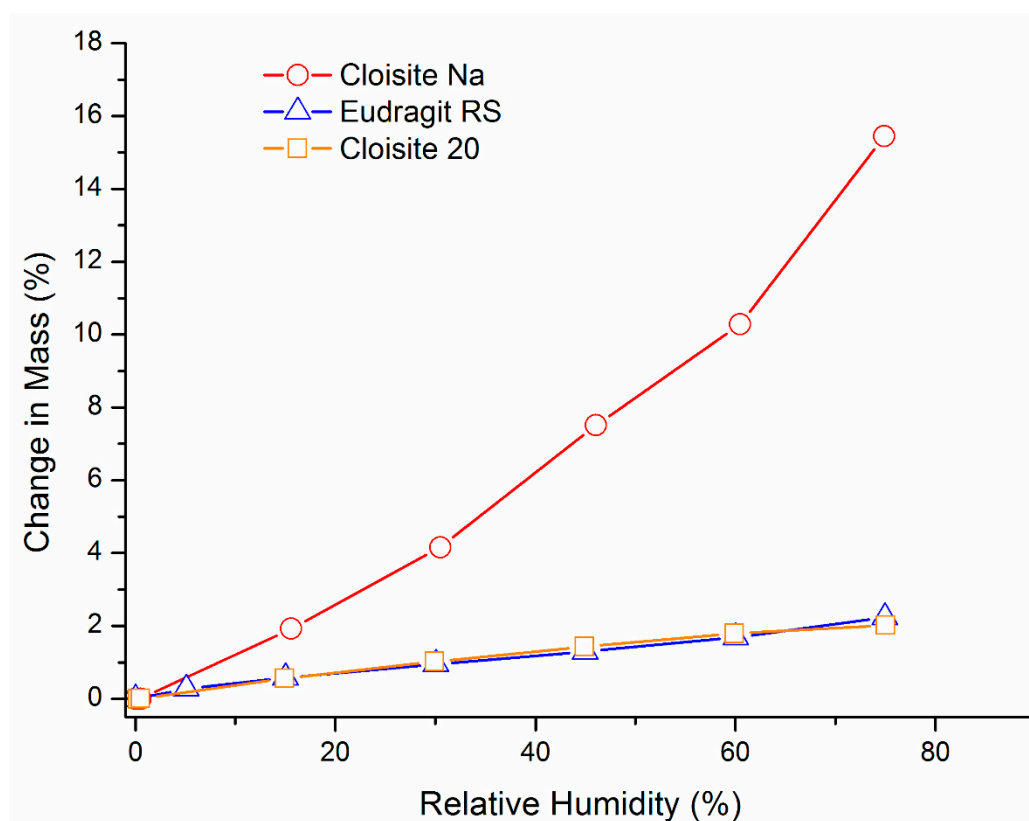

**Figure S2.** DVS profiles comparison of Cloisite Na, Eudragit RS and Cloisite 20.
